# Supplementary material for: Sex-Related Differences in Patients With Unexplained Syncope and Bundle Branch Block: Lower Risk of AV Block and Lesser Need for Cardiac Pacing in Women
Source: Frontiers journal article supplement (doi:10.3389/fcvm.2022.838473), 2022-02-25
Supplement: Data_Sheet_1.PDF [file Data_Sheet_1.PDF]

SUPPLEMENTARY FILES:

**Supplementary Table S1**

**Definitions of etiology of syncope**

| <b>Syncope Diagnosis<sup>[1]</sup></b>                      | <b>Definition</b>      |                                                                                                                                                                                                                                                    |
|-------------------------------------------------------------|------------------------|----------------------------------------------------------------------------------------------------------------------------------------------------------------------------------------------------------------------------------------------------|
| <b><i>Vasovagal Syncope</i></b>                             | <b>Certain</b>         | Precipitated by emotional distress or orthostatic stress and associated with typical prodrome                                                                                                                                                      |
|                                                             | <b>Highly Probable</b> | Associated with typical prodrome but without clear trigger, or associated with typical trigger with minimal prodrome<br><br>Or<br><br>ECG recording in the ICM suggestive of reflex origin (Type 1A, 1B,2 of the ISSUE classification)             |
| <b><i>Carotid sinus hypersensitivity</i></b>                | <b>Certain</b>         | Syncope is reproduced in the presence of asystole > 3 seg and/or fall in systolic BP>50 mmHg during CSM                                                                                                                                            |
|                                                             | <b>Highly Probable</b> | presence of asystole > 3 seg and/or fall in systolic BP > 50 mmHg during CSM without reproducing the syncope                                                                                                                                       |
| <b><i>Orthostatic Syncope</i></b>                           | <b>Certain</b>         | Occurs after standing up and there is documentation of symptomatic orthostatic hypotension (OH) in active standing test                                                                                                                            |
|                                                             | <b>Highly Probable</b> | Occurs after standing up and there is documentation of asymptomatic OH in active standing test.<br><br>Or<br><br>Occurs after standing and the ECG recording in the ICM is compatible with OH response (Type 3 or Type 4A of ISSUE classification) |
| <b><i>Arrhythmic Syncope</i></b>                            | <b>Certain</b>         | Clear correlation between arrhythmic event and syncope, or diagnostic findings in the EPS: HV interval $\geq$ 70 msec or $\geq$ 100 msec after class I drug challenge, Advanced AV block, induction of VT or SVT that reproduces the symptoms.     |
|                                                             | <b>Highly Probable</b> | Documentation of asymptomatic advanced AV block, asystole > 3 secs (except asleep), SVT or VT. SNRTc > 525 ms in the EPS+ documented sinus pauses on ECG monitoring.                                                                               |
| <b><i>Advanced AVB / Severe conduction disturbances</i></b> | <b>Certain</b>         | Correlation between type II 2 <sup>nd</sup> degree, 3d degree or high-grade AVB event and                                                                                                                                                          |

|                                    |                        |                                                                                                                                                                                          |
|------------------------------------|------------------------|------------------------------------------------------------------------------------------------------------------------------------------------------------------------------------------|
|                                    |                        | syncope, or diagnostic findings in the EPS: HV interval $\geq 70$ msec or $\geq 100$ msec after class I drug challenge, intra-Hisian or infra-Hisian block                               |
|                                    | <b>Highly Probable</b> | Documentation of asymptomatic . type II 2 <sup>nd</sup> degree, 3d degree or high-grade AVB                                                                                              |
| <b>Sinus node disfunction</b>      | <b>Certain</b>         | Clear correlation between sinus pause and syncope.                                                                                                                                       |
|                                    | <b>Highly Probable</b> | SNRTc > 525 ms in the EPS+ documented sinus pauses on ECG monitoring. Asystole > 3 secs (except asleep).                                                                                 |
| <b>Acute coronary syndrome</b>     | <b>Highly Probable</b> | Occurs during the acute phase of an ACS, with typical chest pain, acute ischemic ECG changes and/or troponin rise.                                                                       |
| <b>Exercise Low Cardiac Output</b> | <b>Highly Probable</b> | Occurs during intense exercise such as fast walking, running or dancing in presence of a ventricular outflow obstruction (like aortic stenosis), without criteria for previous diagnosis |

CSM: carotid sinus massage / BP: blood pressure / OH: orthostatic hypotension / EPS: Electrophysiology study / AV: atrio-ventricular / VT: ventricular tachycardia / SVT: Supraventricular tachycardia / SNRTc: corrected sinus node recovery time / ACS: acute coronary syndrome

**TABLE S2 –Logistic regression model to assess the association between sex and aAVB/sCD.**

|                   | <b>Factor</b>       | <b>OR</b>   | <b>OR 95% CI</b> | <b>p value</b> |
|-------------------|---------------------|-------------|------------------|----------------|
| <i>Unadjusted</i> |                     |             |                  |                |
|                   | <b>Women</b>        | <b>0.66</b> | <b>0.45-0.98</b> | <b>0.038</b>   |
|                   |                     |             |                  |                |
| <i>Adjusted</i>   |                     |             |                  |                |
|                   | <b>Women</b>        | <b>0.44</b> | <b>0.26-0.74</b> | <b>0.002</b>   |
|                   | Age>75 y.o          | 1.13        | 0.70-1.84        | 0.618          |
|                   | Hypertension        | 1.07        | 0.59-1.92        | 0.834          |
|                   | Diabetes            | 0.94        | 0.57-1.55        | 0.805          |
|                   | IHD                 | 1.20        | 0.68-2.13        | 0.553          |
|                   | LVEF<45%            | 0.79        | 0.40-1.57        | 0.498          |
|                   | Atrial Fibrillation | 1.03        | 0.48-2.22        | 0.942          |
|                   | Recurrent syncope   | 1.21        | 0.75-1.94        | 0.430          |
|                   | LBBB                | 2.80        | 1.21-6.47        | 0.016          |
|                   | Isolated RBBB       | 0.29        | 0.09-0.89        | 0.030          |
|                   | RBBB and LAFB       | 0.89        | 0.41-1.93        | 0.773          |
|                   | Long PR interval    | 2.52        | 1.48-4.27        | 0.001          |

CI: confidence interval; OR: odds ratio; y.o: years old. IHD: Ischemic heart disease. LVEF: Left ventricular ejection fraction; LBBB: Left bundle branch block; RBBB: Right bundle branch block; LAFB: Left anterior fascicular block.

**TABLE S3** Type of cardiac device implanted to treat the syncope

| Type of device                 | TOTAL      | MEN        | WOMEN     |
|--------------------------------|------------|------------|-----------|
|                                | (n=252)    | (n=167)    | (n=85)    |
| VVI pacemaker, <i>n</i> %      | 82 (32.5)  | 51 (30.5)  | 31 (36.5) |
| DDD pacemaker, <i>n</i> %      | 155 (61.2) | 103 (61.7) | 52 (61.2) |
| CRT-pacemaker, <i>n</i> %      | 7 (2.8)    | 7 (4.2)    | 0 (0)     |
| Single chamber ICD, <i>n</i> % | 2 (0.8)    | 2 (1.2)    | 0 (0)     |
| Dual chamber ICD, <i>n</i> %   | 2 (0.8)    | 2 (1.2)    | 0 (0)     |
| CRT-ICD, <i>n</i> %            | 4 (2.4)    | 2 (1.2)    | 2 (2.4)   |

*CRT: Cardiac resynchronization therapy. ICD: Implantable cardiac defibrillator*

**TABLE S4 – Mechanism of syncope recurrence after the diagnosis and appropriate treatment.**

| Mechanism                    | TOTAL     | MEN      | WOMEN    |
|------------------------------|-----------|----------|----------|
|                              | (n=30)    | (n=19)   | (n=11)   |
| <i>Orthostatic</i>           | 16 (53.3) | 9 (47.4) | 7 (63.6) |
| <i>Reflex</i>                | 2 (6.7)   | 2 (10.5) | 0 (0)    |
| <i>aAVB/sCD</i>              | 2 (6.7)   | 2 (10.5) | 0 (0)    |
| <i>Low cardiac output</i>    | 1 (3.3)   | 0 (0)    | 1 (9.1)  |
| <i>VT</i>                    | 2 (6.7)   | 2 (10.5) | 0 (0)    |
| <i>Fast SVT/AF</i>           | 2 (6.7)   | 1 (5.3)  | 1 (9.1)  |
| <i>SND</i>                   | 0         | 0        | 0        |
| <i>CSH</i>                   | 0         | 0        | 0        |
| <i>Pacemaker dysfunction</i> | 2 (6.7)   | 1 (5.3)  | 1 (9.1)  |
| <i>Other</i>                 | 1 (3.3)   | 1 (5.3)  | 0 (0)    |
| <i>Unknown, n %</i>          | 2 (6.7)   | 1 (5.3)  | 1 (9.1)  |

*aAVB/sCD: advanced atrio-ventricular block or severe conduction disturbances; VT: Ventricular Tachycardia; SND: Sinus node dysfunction. SVT: Supraventricular tachycardia. AF: Atrial tachycardia. CSH: Carotid sinus hypersensitivity*
